# Supplementary material for: SARS-CoV-2 specific T cell responses are lower in children and increase with age and time after infection
Source: PubMed Central journal article supplement — medRxiv. 2021 Feb 5:2021.02.02.21250988. Preprint. [Version 1] doi: 10.1101/2021.02.02.21250988 (PMC7872365; doi:10.1101/2021.02.02.21250988), 2021-02-05
Supplement: media-1.pdf [file media-1.pdf]

**Supplementary Table 1.** T cell response in COVID-19 patients, trend and versus controls

| T cells    | Trend days after symptom onset                    |            | Children vs Adults |           | COVID-19 cases vs Controls |                   |          |              |
|------------|---------------------------------------------------|------------|--------------------|-----------|----------------------------|-------------------|----------|--------------|
|            | Estimate                                          | P-value    | Estimate           | P-value   | Median (case)              | Median (negative) | P-value  |              |
| <b>CD4</b> | Structural IFN $\gamma^+$ (total)                 | 0.000012   | 0.920              | -0.029    | <b>0.01</b>                | 0.0479            | 0.00999  | <b>0.003</b> |
|            | ORF1ab IFN $\gamma^+$ (total)                     | 0.00016    | 0.310              | 0.017     | 0.297                      | 0.0235            | 0.0115   | <b>0.004</b> |
|            | Accessory IFN $\gamma^+$ (total)                  | -0.000037  | 0.256              | -0.0043   | 0.153                      | 0.0124            | 0.0134   | 0.350        |
|            | Structural TEM                                    | 0.0032     | 0.950              | -3.2      | 0.493                      | 88.7              | 89.5     | 0.552        |
|            | Structural TCM                                    | -0.017     | 0.577              | 1.5       | 0.625                      | 9.28              | 8.54     | 0.752        |
|            | Structural IFN $\gamma^+$ TNF $\alpha^+$          | -0.0000095 | 0.637              | -6.00E-04 | 0.756                      | 0.00436           | 0.000813 | <b>0.051</b> |
|            | Structural IFN $\gamma^+$ TNF $\alpha^+$ IL2 $^+$ | -0.000086  | <b>0.003</b>       | -0.0077   | 0.232                      | 0.00342           | 0.000723 | 0.068        |
| <b>CD8</b> | Structural IFN $\gamma^+$ (total)                 | 0.00014    | 0.592              | -0.094    | <b>0.009</b>               | 0.0345            | 0.0395   | 0.884        |
|            | ORF1ab IFN $\gamma^+$ (total)                     | 0.00052    | 0.596              | -0.27     | <b>0.008</b>               | 0.101             | 0.101    | 0.818        |
|            | Accessory IFN $\gamma^+$ (total)                  | -0.000029  | 0.084              | -0.0021   | 0.184                      | 0.00796           | 0.0157   | 0.156        |
|            | Structural TEM                                    | -0.045     | 0.452              | 7.7       | 0.232                      | 77.4              | 68.5     | 0.350        |
|            | Structural TCM                                    | 0.10       | <b>0.006</b>       | -2.1      | 0.546                      | 10.6              | 20.6     | <b>0.022</b> |
|            | Structural IFN $\gamma^+$ TNF $\alpha^+$          | 0.0000050  | 0.678              | -0.0015   | 0.219                      | 0.000595          | 0        | <b>0.036</b> |
|            | Structural IFN $\gamma^+$ TNF $\alpha^+$ IL2 $^+$ | 0.00000031 | 0.845              | -0.00041  | 0.276                      | 0                 | 0        | 0.315        |

\* P value by Mann-Whitney test, significant values in red

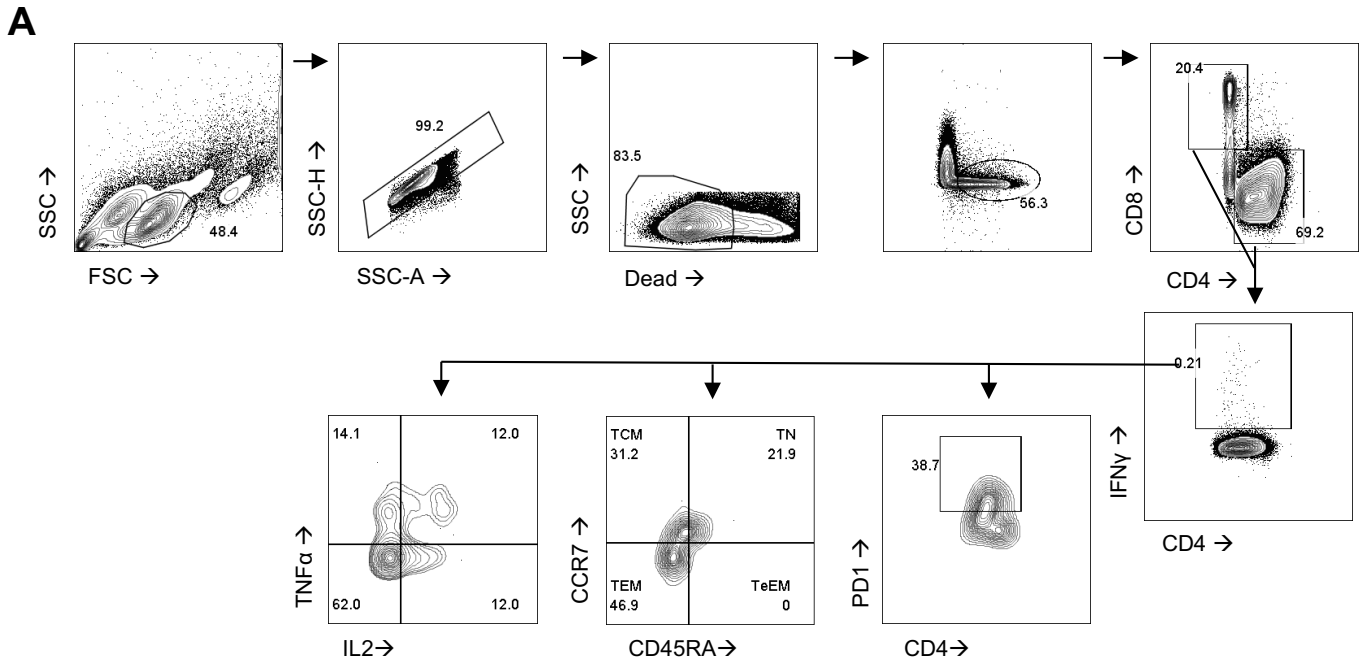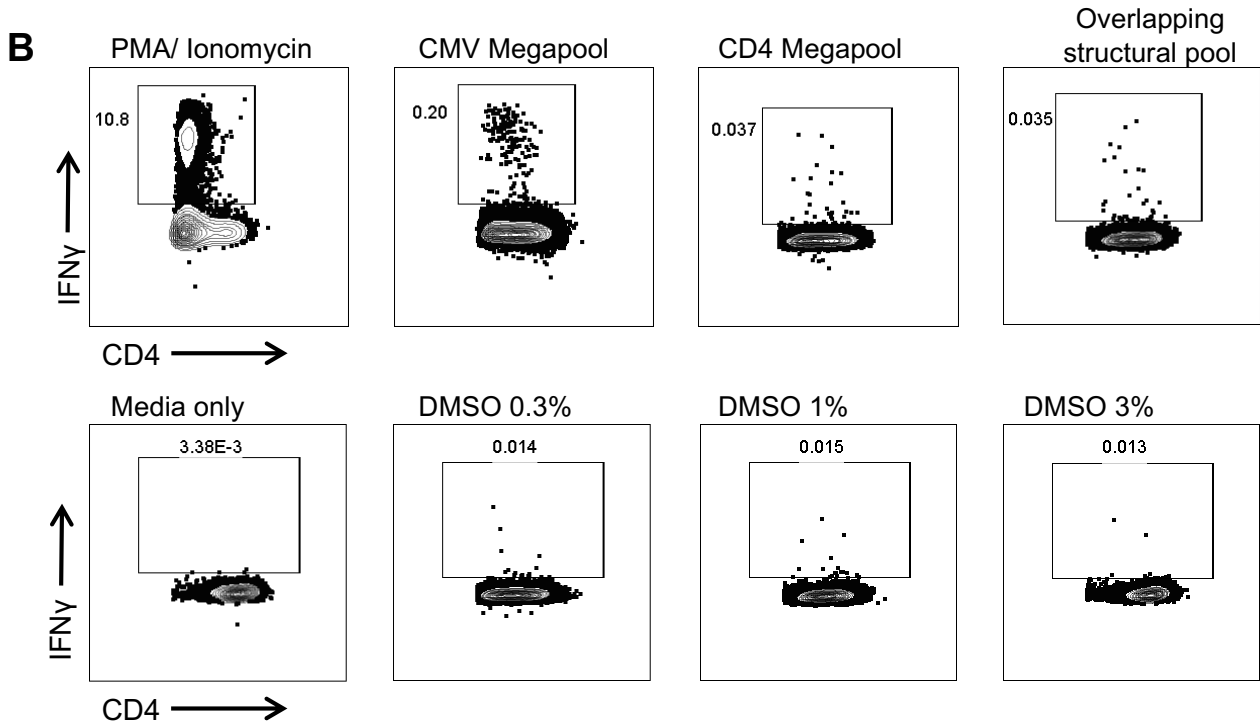

**Supplementary Figure 1 – SARS-CoV-2 specific cells for cytokine production and phenotype by Flow cytometry.** (A) The gating strategy for the characterisation of IFN $\gamma$ <sup>+</sup> responses for CD4<sup>+</sup> and CD8<sup>+</sup> T cells for cytokine production (IFN $\gamma$ , TNF $\alpha$ , IL-2), memory phenotype (CCR7, CD45RA), and exhaustion markers (PD-1). (B) FACS plots showing CD4<sup>+</sup> IFN $\gamma$  production to positive controls, PMA/Ionomycin, a CMV megapool and a CD4 specific megapool (from Grifoni *et al.* 2020), and negative controls with a range of DMSO concentrations.

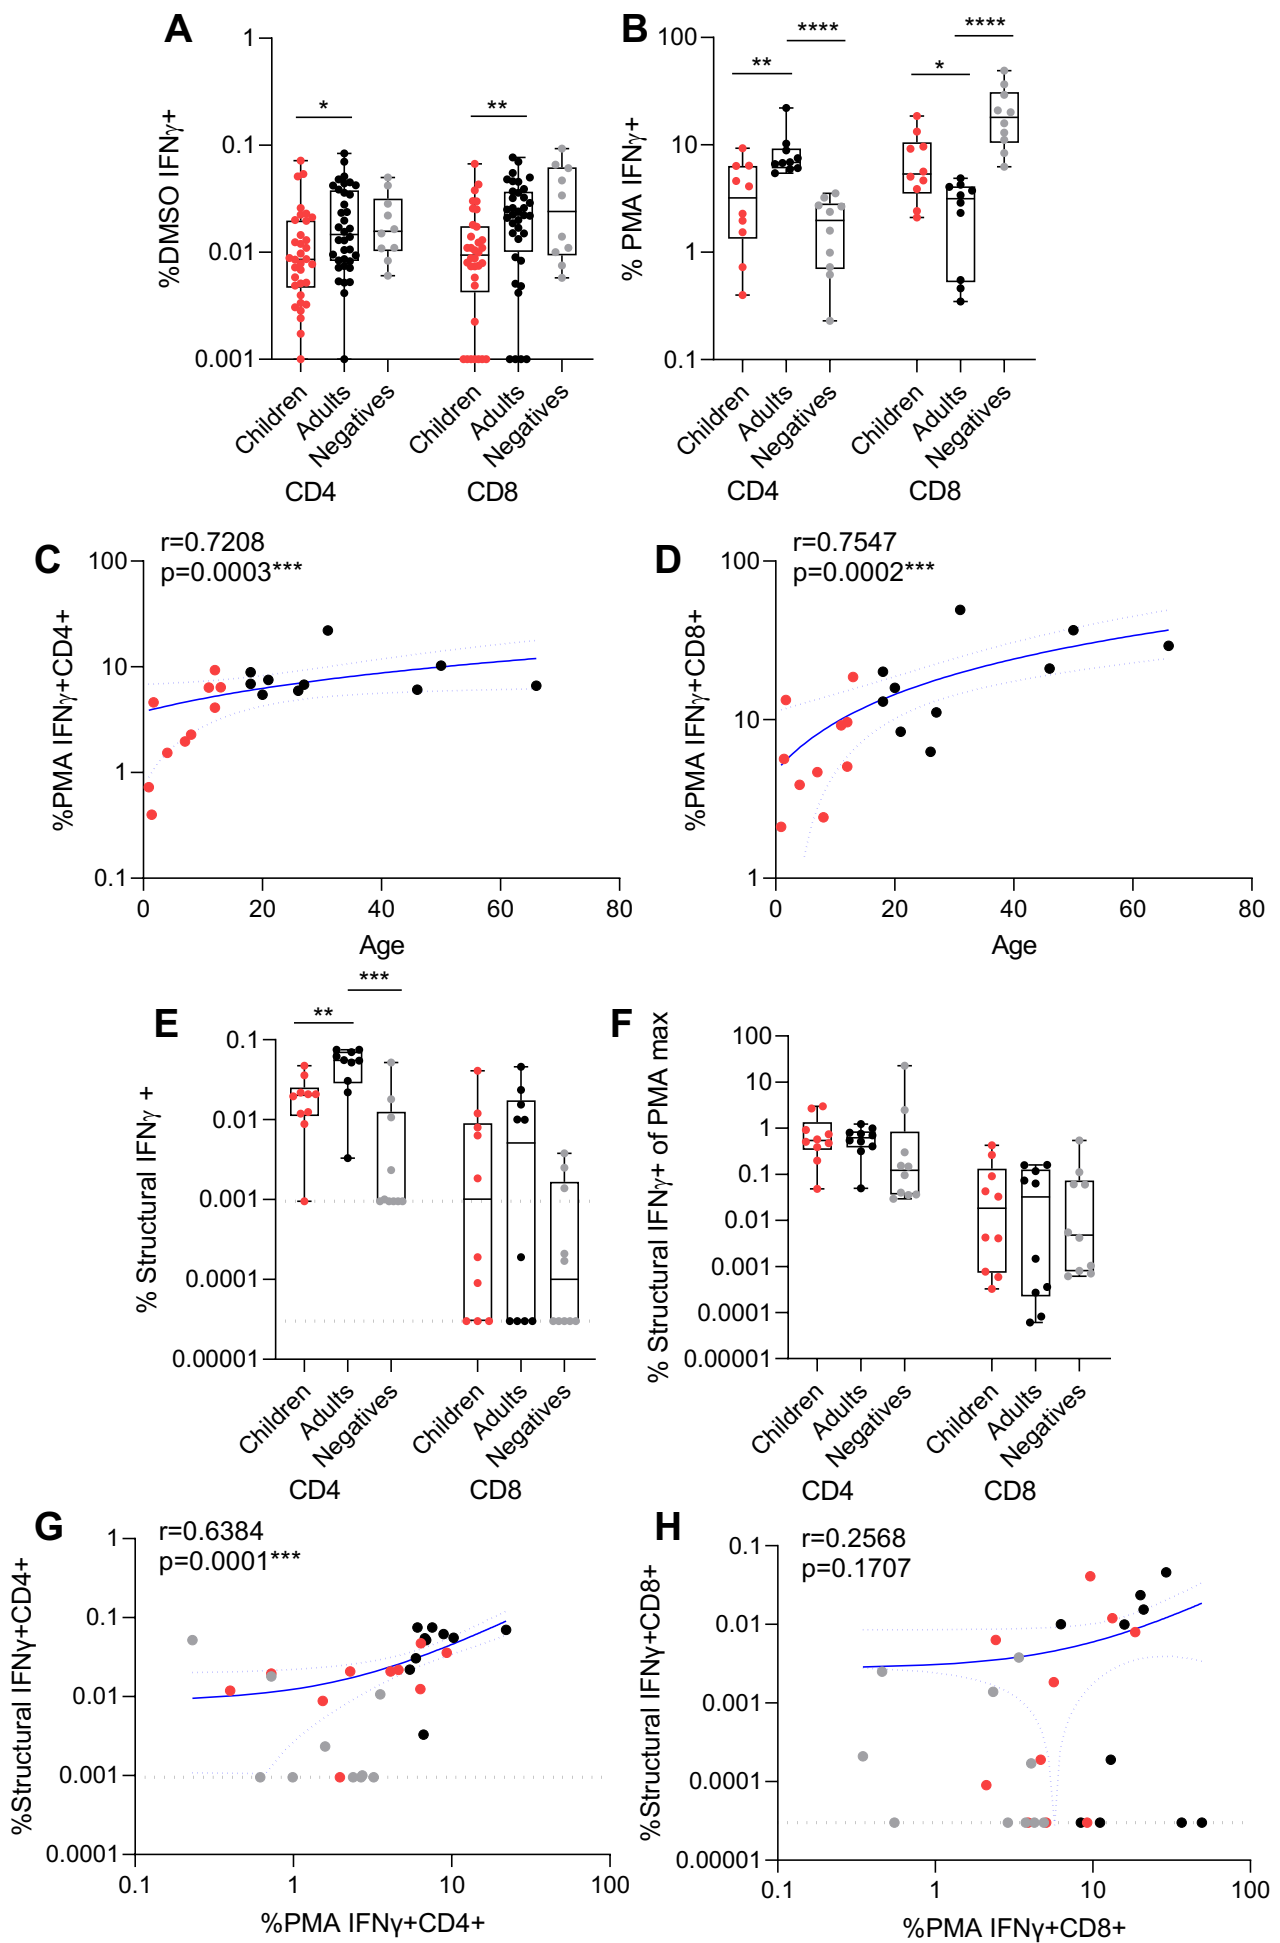

Supplementary Figure 2

**Supplementary Figure 2 – Maximum CD4<sup>+</sup> and CD8<sup>+</sup> IFN $\gamma$  T cell responses increase with age.** CD4<sup>+</sup> and CD8<sup>+</sup> T cell responses for (A) background (by DMSO stimulation) and (B) maximum (by PMA/Ionomycin stimulation) in children (n=10) and adults (n=10) from convalescent/memory time points (mean $\pm$ stdev: 56.9 $\pm$ 29.7, range: 27-138 days post symptom onset), and uninfected adult controls (n=10). Comparisons by Mann Whitney test where \*\*p<0.01, \*\*\*p<0.001, \*\*\*\*p<0.0001. Correlation of age with CD4<sup>+</sup> (C) and CD8<sup>+</sup> T cell responses by PMA/ionomycin stimulation. Spearman's test was used to calculate r values, and statistical significance is displayed as \*\*\*p<0.001. Blue lines of linear regression represent the overall trend with dotted lines showing 95% confidence intervals. Black dotted lines represent the limit of detection (IFN $\gamma$  of CD4<sup>+</sup>=0.0095%, IFN $\gamma$  of CD8<sup>+</sup>=0.00003%). (E) The structural peptide pool response for CD4<sup>+</sup> and CD8<sup>+</sup> T cells in adults and children (F) normalised to a paired maximum IFN $\gamma$  production from (B) PMA/ionomycin stimulation. Correlation of IFN $\gamma$  production against structural pool and PMA/Ionomycin in CD4<sup>+</sup>(G) and CD8<sup>+</sup> T cells cells (H).

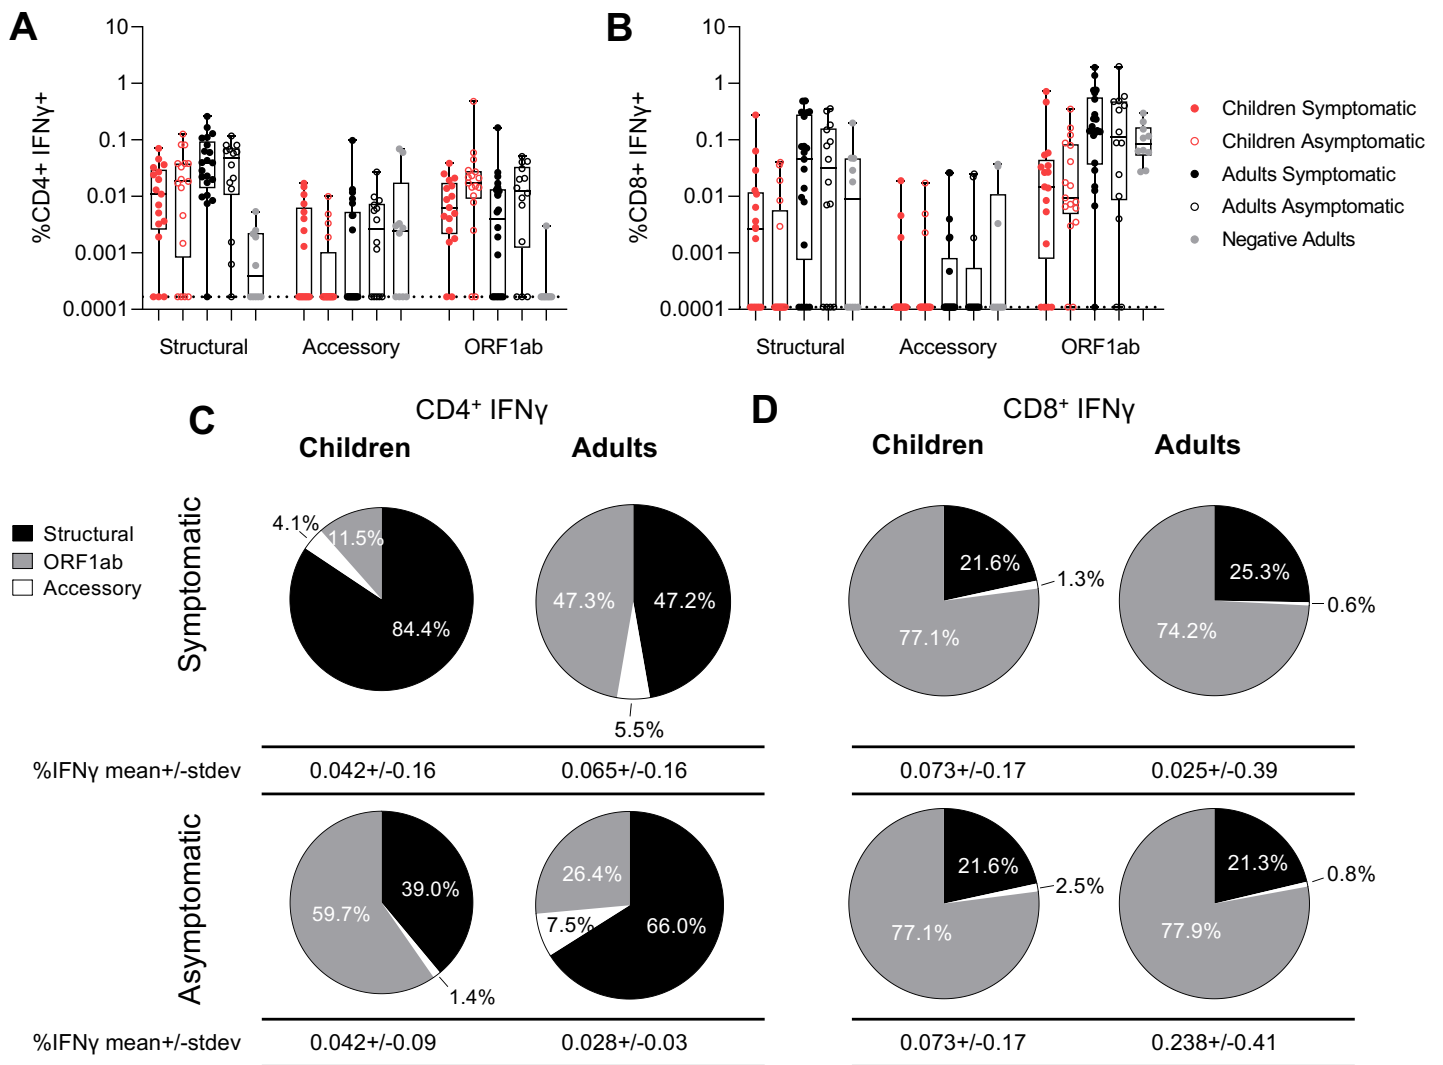

**Supplementary Figure 3 - IFN $\gamma$  CD4<sup>+</sup> and CD8<sup>+</sup> T cell responses are not different between symptomatic or asymptomatic SARS-CoV-2 infected children or adults.** The SARS-CoV-2 CD4<sup>+</sup> (A) or CD8<sup>+</sup> (B) T cell responses of COVID-19 symptomatic children (n= 17, mean $\pm$ stdev: 38.8 $\pm$ 40.6 days), asymptomatic children (n= 17, 26.2 $\pm$ 39.3 days), symptomatic adults (n= 22, 60.3 $\pm$ 55.5 days), asymptomatic adults (n= 14, 32.8 $\pm$ 32.3 days), from acute, convalescent and long-term memory time points (day 1 to 180 post symptom onset) and negative controls (n=10). Data represents the individual response with background subtracted, mean with upper and lower quartiles, minimum and maximum. Multiple comparisons were performed using Kruskal-Wallis test for between-group comparison. Pie charts of total IFN $\gamma$ <sup>+</sup> CD4<sup>+</sup> (C) and CD8<sup>+</sup> (D) T cell SARS-CoV-2 responses with background subtracted and non-responders assigned a response of zero (from A, B).

## A Monocytes:

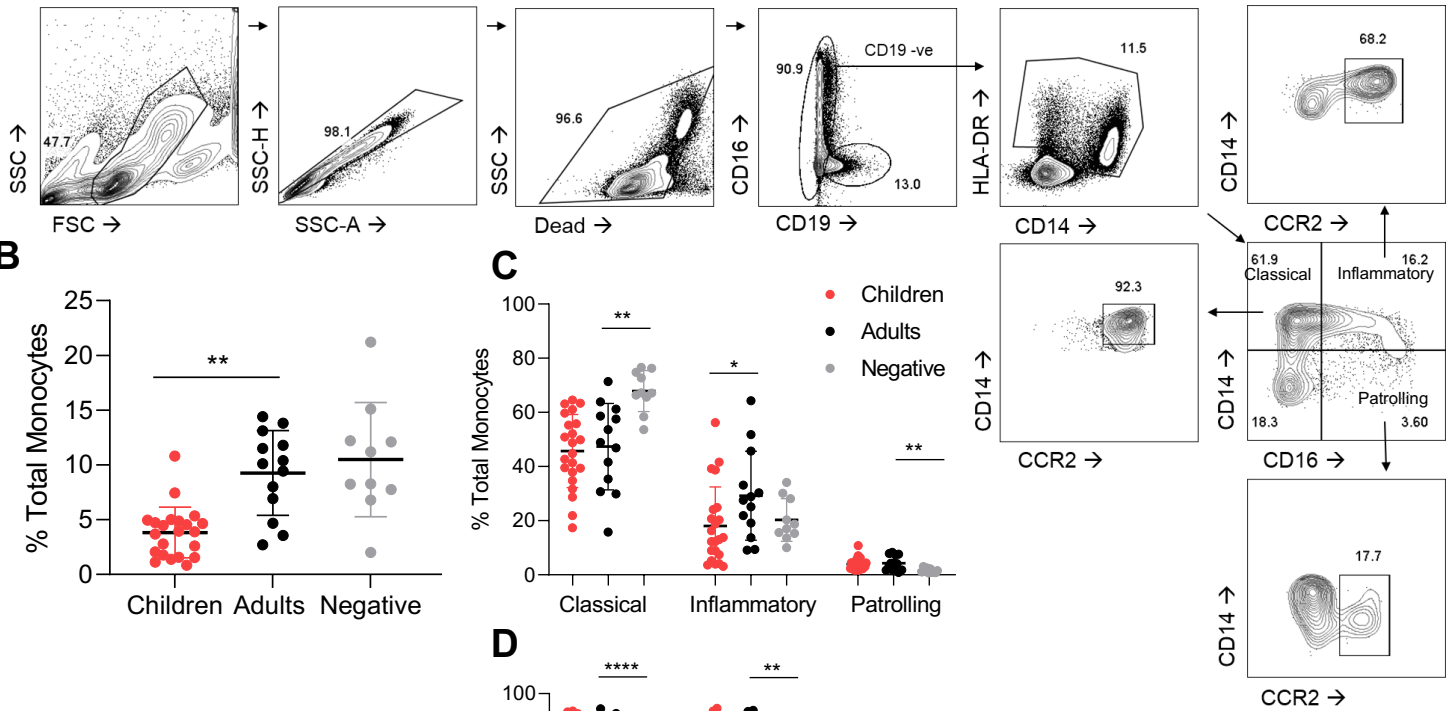

## E T follicular helper cells:

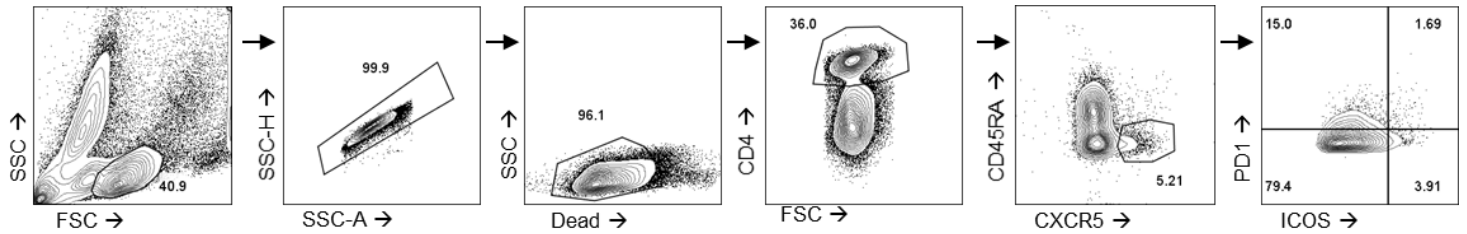

## F Plasmablasts:

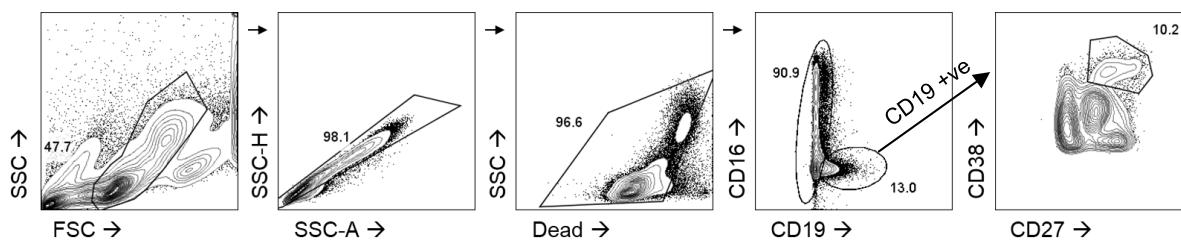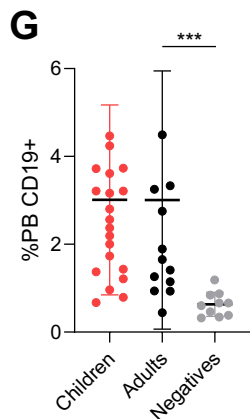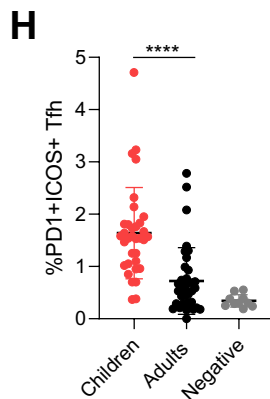

**Supplementary Figure 4 – Cellular recruitment during acute infection of children shows increased Tfh responses.** (A) The gating strategy for characterisation of total, classical, inflammatory and patrolling monocytes and their activation levels (by CCR2). Early (<day 14) recruitment of innate and adaptive cells was measured by flow cytometry for COVID-19 children (n= 22), adults (n= 13) and negative controls (n=10). The total monocytes (B), monocyte phenotype (C), and activation of monocytes (D). The T follicular helper (E) and plasmablast (F) response was determined for activated Tfh (G), and total plasmablast (H). Data represents the individual response, mean±SD. Statistical differences were determined using Mann-Whitney test between children and adults, or adults and negatives where \*\*p<0.01, \*\*\*p<0.001, \*\*\*\*p<0.0001.

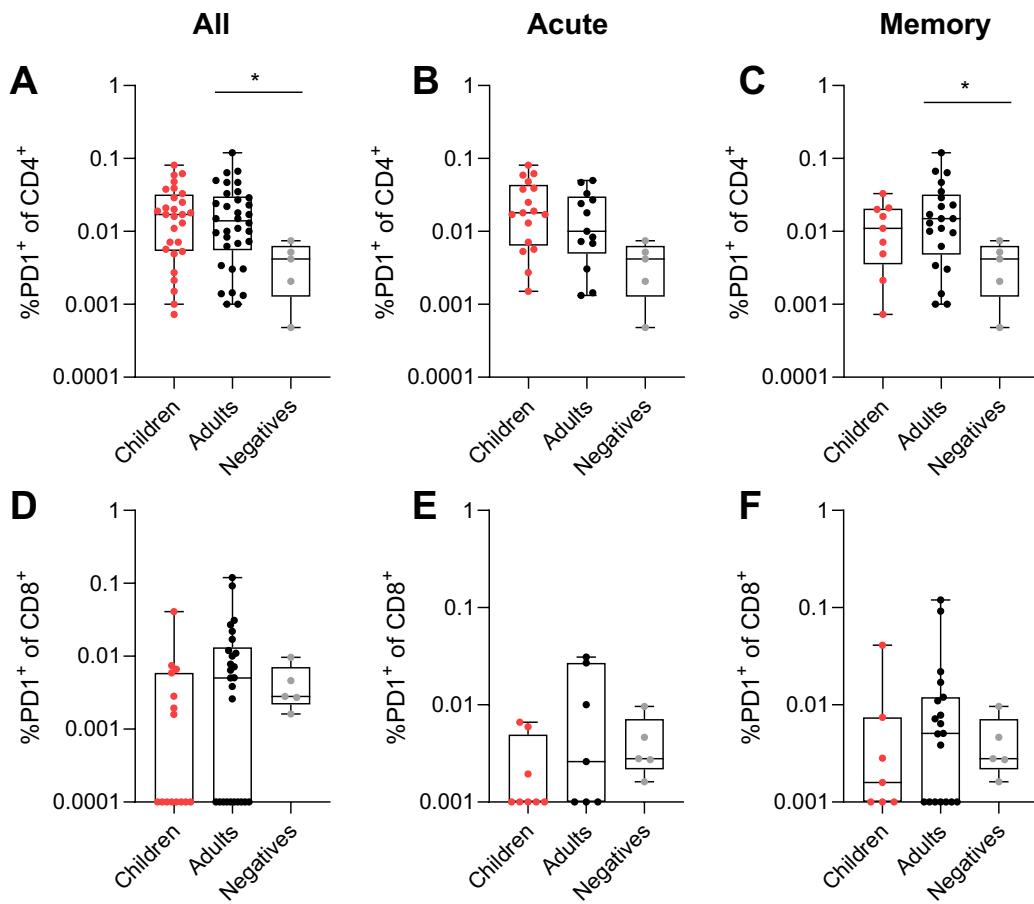

**Supplementary Figure 5 – T cell exhaustion is equivalent in adult and children CD4 and CD8 T cells.** PD1<sup>+</sup> IFN $\gamma$ <sup>+</sup> CD4 (A-C) and CD8 (D-F) T cells in response to stimulation with structural pool at all time points (A, D) (day 1-180) in children (red), adults (black) and negative adults (grey) who are responders. Data separated into acute (B, E) (day < 14 post symptom onset) and convalescent/memory (C, F) (day 15-180 post infection) time points. Comparisons between infected children and adults, or infected adults and negative adults are carried out using Mann Whitney (unpaired) test where \* $p < 0.05$ .
